# Supplementary material
Source: PubMed Central journal article supplement (PMC5798356)
Supplement: pnas.1715564115.sapp.pdf [file pnas.1715564115.sapp.pdf]

## **SUPPLEMENTARY INFORMATION**

Title: Human Airway Branch Variation and Chronic Obstructive Pulmonary Disease

### **CONENTS**

| <i>Section</i> | <i>Page</i> |
|----------------|-------------|
| Tables         | 2           |
| Figures        | 22          |
| References     | 30          |

**SUPPLEMENTARY INFORMATION TABLES:**

Table S1. Characteristics of MESA Participants and Smokers in SPIROMICS.

|                                       | MESA participants<br>attending Exam 5 |                                        | Smokers in SPIROMICS<br>attending Exam 1 <sup>a</sup> |                                     |
|---------------------------------------|---------------------------------------|----------------------------------------|-------------------------------------------------------|-------------------------------------|
|                                       | Included in<br>analysis<br>N=3,169    | Not included in<br>analysis<br>N=1,751 | Included in<br>analysis<br>N=2,746                    | Not included in<br>analysis<br>N=26 |
| Age – years                           | 69.3±9.2                              | 70.8±9.8                               | 63.5±8.9                                              | 63.5±8.9                            |
| Male – %                              | 47.7                                  | 44.7                                   | 53.9                                                  | 69.2                                |
| Height – cm                           | 165.5±9.9                             | 165.0±10.2                             | 169.8±9.5                                             | 171.8±11.2                          |
| Weight – kg                           | 78.2±17.5                             | 78.1±18.5                              | 80.7±18.0                                             | 82.4±15.7                           |
| Race-ethnicity – %                    |                                       |                                        |                                                       |                                     |
| Caucasian American                    | 38.9                                  | 46.0                                   | 74.1                                                  | 57.7                                |
| African American                      | 27.2                                  | 25.2                                   | 17.9                                                  | 34.6                                |
| Hispanic American                     | 21.0                                  | 20.8                                   | 4.6                                                   | 7.7                                 |
| Asian American/Other                  | 13.0                                  | 8.0                                    | 3.4                                                   | 0.0                                 |
| Educational attainment – %            |                                       |                                        |                                                       |                                     |
| Less than high school                 | 13.7                                  | 15.3                                   | 11.4                                                  | 38.5                                |
| High school degree                    | 17.8                                  | 16.7                                   | 26.9                                                  | 26.9                                |
| Some college                          | 28.8                                  | 29.6                                   | 35.3                                                  | 19.2                                |
| College degree or higher              | 39.5                                  | 38.2                                   | 26.2                                                  | 15.4                                |
| Smoking status – %                    |                                       |                                        |                                                       |                                     |
| Non-smoker                            | 45.6                                  | 43.9                                   | 0.0                                                   | 0.0                                 |
| Former                                | 46.8                                  | 47.7                                   | 60.5                                                  | 65.4                                |
| Current                               | 7.6                                   | 8.4                                    | 39.5                                                  | 34.6                                |
| Pack-years among ever smokers         | 14.5 (3.0, 33.0)                      | 9.0 (1.5, 31.0)                        | 43.0 (31.3, 60.0)                                     | 50.0 (26.5, 75.0)                   |
| Smoker at home during childhood – %   | 55.5                                  | 46.5                                   | 81.3                                                  | 86.7                                |
| Maternal smoking during pregnancy – % | NA                                    | NA                                     | 9.1                                                   | 16.0                                |
| Childhood diagnosis of asthma – %     | 4.2                                   | 4.8                                    | 23.3                                                  | 25.0                                |

Values represent mean ± SD, percentages, or median (25<sup>th</sup>, 75<sup>th</sup> percentile). <sup>a</sup>SPIROMICS dataset release: 08/01/2016.

Abbreviations: MESA = Multi-Ethnic Study of Atherosclerosis; SPIROMICS = Subpopulations and Intermediate Outcome Measures in COPD Study; NA = not available.

Table S2. Clinical Characteristics of Participants with Standard Anatomy and Common Airway Branch Variants in the MESA Lung Study.

|                                           | <b>Standard anatomy</b> | <b>Accessory sub-superior airway</b> | <b>Absent right medial-basal airway</b> |
|-------------------------------------------|-------------------------|--------------------------------------|-----------------------------------------|
|                                           | N=2,329                 | N=506                                | N=193                                   |
| Age – years                               | 69.5±9.2                | 68.7±9.1                             | 69.2±9.3                                |
| Male – %                                  | 48.5                    | 48.4                                 | 42.0                                    |
| Height – cm                               | 165.5±10.0              | 166.3±9.7                            | 162.6±9.6                               |
| Weight – kg                               | 78.2±17.6               | 80.2±17.6                            | 74.2±16.2                               |
| Race-ethnicity – %                        |                         |                                      |                                         |
| Caucasian American                        | 37.1                    | 51.2                                 | 34.7                                    |
| African American                          | 27.6                    | 25.3                                 | 18.1                                    |
| Hispanic American                         | 21.2                    | 18.2                                 | 25.4                                    |
| Asian American/Other                      | 14.1                    | 5.3                                  | 21.8                                    |
| Educational Attainment – %                |                         |                                      |                                         |
| Less than high school                     | 13.6                    | 12.3                                 | 20.3                                    |
| High school degree                        | 18.1                    | 15.8                                 | 17.2                                    |
| Some College                              | 28.2                    | 30.3                                 | 29.2                                    |
| College degree or higher                  | 39.9                    | 41.6                                 | 33.3                                    |
| Smoking status – %                        |                         |                                      |                                         |
| Non-smoker                                | 46.2                    | 41.7                                 | 53.4                                    |
| Former                                    | 46.8                    | 50.0                                 | 35.2                                    |
| Current                                   | 7.0                     | 8.3                                  | 11.4                                    |
| Pack-years among ever smokers             | 14.0 (2.8, 33.0)        | 15.5 (5.0, 33.0)                     | 17.8 (1.2, 39.2)                        |
| Living with a smoker during childhood – % | 55.2                    | 54.2                                 | 55.9                                    |
| Childhood diagnosis of asthma – %         | 4.3                     | 5.6                                  | 2.3                                     |
| CT lung volume – L                        |                         |                                      |                                         |
| Upper lobes                               | 2.6±0.7                 | 2.7±0.7                              | 2.5±0.7                                 |
| Lower lobes                               | 2.2±0.7                 | 2.3±0.7                              | 2.1±0.6                                 |

Values represent mean ± SD, percentages, or median (25th, 75th percentile).

Standard anatomy is defined as the presence of right and left superior, anterior-basal, lateral-basal and posterior-basal segmental airways, as well as the right medial-basal segmental airway. Participants with rare (<5% prevalence) airway branch variants such as presence of the left medial-basal airway, or combinations of the above-mentioned variants are not shown (MESA Lung, n=141).

Abbreviations: MESA = Multi-Ethnic Study of Atherosclerosis; COPD = chronic obstructive pulmonary disease; CT = computed tomography.

Table S3. Characteristics of MESA Lung Participants with and without Spirometric Assessment for COPD among those Included in Airway Anatomy Prevalence Analysis.

|                                     | <b>Participants Included in<br/>Airway Anatomy Prevalence Analysis</b> |                                                   |
|-------------------------------------|------------------------------------------------------------------------|---------------------------------------------------|
|                                     | <b>Included in COPD analysis</b><br>N=2,308                            | <b>Not included in COPD<br/>analysis</b><br>N=861 |
| Age – years                         | 67.9±8.9                                                               | 72.8±9.1                                          |
| Male – %                            | 47.1                                                                   | 49.4                                              |
| Height – cm                         | 165.4±9.8                                                              | 165.5±10.4                                        |
| Weight – kg                         | 78.7±17.4                                                              | 76.7±17.6                                         |
| Race-ethnicity – %                  |                                                                        |                                                   |
| Caucasian American                  | 36.7                                                                   | 45.0                                              |
| African American                    | 27.0                                                                   | 27.5                                              |
| Hispanic American                   | 23.1                                                                   | 15.3                                              |
| Asian American/Other                | 13.3                                                                   | 12.2                                              |
| Educational attainment – %          |                                                                        |                                                   |
| Less than high school               | 13.7                                                                   | 13.8                                              |
| High school degree                  | 17.2                                                                   | 19.2                                              |
| Some college                        | 29.5                                                                   | 27.0                                              |
| College degree                      | 39.4                                                                   | 39.9                                              |
| Smoking status – %                  |                                                                        |                                                   |
| Non-smoker                          | 46.0                                                                   | 44.5                                              |
| Former                              | 46.6                                                                   | 47.2                                              |
| Current                             | 7.4                                                                    | 8.4                                               |
| Pack-years among ever smokers       | 13.5 (2.8, 31.0)                                                       | 18.0 (4.0, 39.1)                                  |
| Lower lobe segmental airway anatomy |                                                                        |                                                   |
| Standard anatomy                    | 73.7                                                                   | 71.7                                              |
| Accessory sub-superior airway       | 15.5                                                                   | 17.6                                              |
| Absent right medial-basal airway    | 5.9                                                                    | 6.7                                               |
| Rare airway variants <sup>a</sup>   | 4.9                                                                    | 4.0                                               |

Values represent mean ± SD, percentages, or median (25<sup>th</sup>, 75<sup>th</sup> percentile). <sup>a</sup>Rare airway branch variants included presence of the left medial-basal airway, or various combinations of the above-mentioned variants.

Abbreviations: MESA = Multi-Ethnic Study of Atherosclerosis; COPD = chronic obstructive pulmonary disease.

Table S4. Characteristics of MESA Lung and SPIROMICS Participants Included in the COPD Analyses According to COPD Status.

|                                     | MESA Lung Study   |                    | SPIROMICS         |                   |
|-------------------------------------|-------------------|--------------------|-------------------|-------------------|
|                                     | COPD<br>N=243     | No COPD<br>N=2,065 | COPD<br>N=1,823   | No COPD<br>N=923  |
| Age – years                         | 72.3±8.8          | 67.4±8.8           | 65.1±8.0          | 60.2±9.7          |
| Male – %                            | 60.5              | 45.5               | 57.2              | 47.5              |
| Height – cm                         | 168.5±9.7         | 165.1±9.7          | 170.1±9.7         | 169.3±9.3         |
| Weight – kg                         | 78.2±17.2         | 78.8±17.5          | 79.4±18.1         | 83.4±17.6         |
| Race-ethnicity – %                  |                   |                    |                   |                   |
| Caucasian American                  | 50.6              | 35.0               | 78.7              | 65.1              |
| African American                    | 24.7              | 27.3               | 14.4              | 24.8              |
| Hispanic American                   | 17.7              | 23.7               | 3.8               | 6.2               |
| Asian American/Other                | 7.0               | 14.0               | 3.1               | 3.9               |
| Educational attainment – %          |                   |                    |                   |                   |
| Less than high school               | 14.8              | 13.6               | 12.0              | 10.2              |
| High school degree                  | 17.8              | 17.2               | 26.7              | 26.4              |
| Some college                        | 28.4              | 29.6               | 35.2              | 35.3              |
| College degree or higher            | 39.0              | 39.4               | 25.7              | 27.2              |
| Smoking status – %                  |                   |                    |                   |                   |
| Non-smoker                          | 20.6              | 49.0               | 0                 | 0                 |
| Former                              | 63.0              | 44.7               | 66.0              | 49.7              |
| Current                             | 16.5              | 6.3                | 34.0              | 50.3              |
| Pack-years among ever smokers       | 30.0 (14.4, 48.0) | 11.3 (2.0, 27.0)   | 46.0 (35.0, 62.0) | 37.0 (30.0, 49.5) |
| COPD GOLD severity – %              |                   |                    |                   |                   |
| Mild                                | 54.3              | -                  | 22.1              | -                 |
| Moderate                            | 41.2              | -                  | 44.5              | -                 |
| Severe-to-very severe               | 4.5               | -                  | 33.3              | -                 |
| CT percent emphysema - %            |                   |                    |                   |                   |
| Upper lobes                         | 3.6 (1.6, 8.7)    | 1.3 (0.5, 2.8)     | 7.6 (2.5, 18.9)   | 1.0 (0.4, 2.2)    |
| Lower lobes                         | 2.8 (1.0, 5.8)    | 0.9 (0.4, 1.9)     | 4.8 (1.6, 12.4)   | 0.8 (0.4, 1.7)    |
| Lower lobe segmental airway anatomy |                   |                    |                   |                   |
| Standard anatomy                    | 67.9              | 75.0               | 57.4              | 65.3              |
| Accessory sub-superior airway       | 21.8              | 14.7               | 30.5              | 26.0              |
| Absent right medial-basal airway    | 6.6               | 5.8                | 6.7               | 4.4               |
| Rare airway variant <sup>a</sup>    | 3.7               | 4.6                | 5.4               | 4.2               |

Values represent mean ± SD, percentages, or median (25th, 75th percentile). <sup>a</sup>Rare airway branch variants included the presence of the left medial-basal airway, or various combinations of the above-mentioned variants.

Abbreviations: MESA = Multi-Ethnic Study of Atherosclerosis; SPIROMICS = Subpopulations and Intermediate Outcome Measures in COPD Study; GOLD = Global Initiative for Obstructive Lung Disease; COPD = chronic obstructive pulmonary disease; CT= computed tomography.

Table S5. Odds Ratios for COPD<sub>LLN</sub> by Common Airway Branch Variants in the MESA Lung Study, SPIROMICS and Both Studies Pooled.

|                                                         | MESA Lung        |                                   |                                   | SPIROMICS        |                                   |                                   | Pooled <sup>a</sup> |                                   |                                   |
|---------------------------------------------------------|------------------|-----------------------------------|-----------------------------------|------------------|-----------------------------------|-----------------------------------|---------------------|-----------------------------------|-----------------------------------|
|                                                         | Standard anatomy | Accessory sub-superior airway     | Absent right medial-basal airway  | Standard anatomy | Accessory sub-superior airway     | Absent right medial-basal airway  | Standard anatomy    | Accessory sub-superior airway     | Absent right medial-basal airway  |
| Participants with COPD                                  | 84               | 35                                | 12                                | 911              | 488                               | 107                               | 995                 | 523                               | 119                               |
| Participants without COPD                               | 1,827            | 379                               | 149                               | 737              | 306                               | 56                                | 2,564               | 685                               | 205                               |
| Odds ratios for COPD                                    |                  |                                   |                                   |                  |                                   |                                   |                     |                                   |                                   |
| Unadjusted                                              | Ref.             | 2.01<br>(1.33 to 3.03)<br>P<0.001 | 1.75<br>(0.94 to 3.28)<br>P=0.080 | Ref.             | 1.29<br>(1.09 to 1.53)<br>P=0.004 | 1.55<br>(1.10 to 2.17)<br>P=0.011 | Ref.                | 1.40<br>(1.19 to 1.64)<br>P<0.001 | 1.55<br>(1.15 to 2.08)<br>P=0.004 |
| Model 1: age, gender, height, weight, race-ethnicity    | Ref.             | 1.92<br>(1.26 to 2.92)<br>P=0.002 | 2.08<br>(1.10 to 3.97)<br>P=0.025 | Ref.             | 1.23<br>(1.03 to 1.47)<br>P=0.023 | 1.45<br>(1.03 to 2.04)<br>P=0.036 | Ref.                | 1.31<br>(1.11 to 1.54)<br>P<0.001 | 1.55<br>(1.13 to 2.12)<br>P=0.006 |
| Model 2: model 1 covariates, smoking status, pack-years | Ref.             | 1.88<br>(1.22 to 2.90)<br>P=0.004 | 1.94<br>(1.00 to 3.79)<br>P=0.051 | Ref.             | 1.21<br>(1.01 to 1.45)<br>P=0.039 | 1.46<br>(1.03 to 2.06)<br>P=0.036 | Ref.                | 1.29<br>(1.09 to 1.52)<br>P=0.003 | 1.57<br>(1.14 to 2.17)<br>P=0.006 |

Odds ratios for COPD<sub>LLN</sub> were calculated using logistic regression with standard anatomy as the reference group. <sup>a</sup>Pooled analysis models include a term for study cohort. Participants with rare airway branch variants consisting of presence of the left medial-basal airway, or combinations of the above-mentioned variants are not shown (MESA: n=103; SPIROMICS: n=137).

Abbreviations: COPD<sub>LLN</sub> = chronic obstructive pulmonary disease defined by an FEV<sub>1</sub>-to-FVC ratio less than the lower limit of normal; FEV<sub>1</sub> = forced expired volume in one second; FVC = forced vital capacity; = MESA Multi-Ethnic Study of Atherosclerosis; SPIROMICS = Subpopulations and Intermediate Outcome Measures in COPD Study.

Table S6. Odds Ratios for COPD<sub>symptoms</sub> by Common Airway Branch Variants in the MESA Lung Study, SPIROMICS and Both Studies Pooled.

|                                                         | MESA Lung        |                                   |                                   | SPIROMICS        |                                   |                                   | Pooled <sup>a</sup> |                                   |                                   |
|---------------------------------------------------------|------------------|-----------------------------------|-----------------------------------|------------------|-----------------------------------|-----------------------------------|---------------------|-----------------------------------|-----------------------------------|
|                                                         | Standard anatomy | Accessory sub-superior airway     | Absent right medial-basal airway  | Standard anatomy | Accessory sub-superior airway     | Absent right medial-basal airway  | Standard anatomy    | Accessory sub-superior airway     | Absent right medial-basal airway  |
| Participants with COPD <sub>symptoms</sub>              | 63               | 18                                | 11                                | 833              | 452                               | 98                                | 896                 | 470                               | 109                               |
| Participants without COPD <sub>symptoms</sub>           | 1,650            | 338                               | 125                               | 817              | 344                               | 65                                | 2,467               | 682                               | 190                               |
| Odds ratios for COPD <sub>symptoms</sub>                |                  |                                   |                                   |                  |                                   |                                   |                     |                                   |                                   |
| Unadjusted                                              | Ref.             | 1.40<br>(0.82 to 2.39)<br>P=0.224 | 2.31<br>(1.19 to 4.49)<br>P=0.014 | Ref.             | 1.29<br>(1.09 to 1.53)<br>P=0.004 | 1.48<br>(1.07 to 2.05)<br>P=0.019 | Ref.                | 1.30<br>(1.11 to 1.53)<br>P=0.002 | 1.60<br>(1.18 to 2.17)<br>P=0.002 |
| Model 1: age, gender, height, weight, race-ethnicity    | Ref.             | 1.31<br>(0.76 to 2.26)<br>P=0.333 | 2.77<br>(1.40 to 5.50)<br>P=0.004 | Ref.             | 1.25<br>(1.05 to 1.49)<br>P=0.011 | 1.42<br>(1.01 to 1.98)<br>P=0.041 | Ref.                | 1.26<br>(1.07 to 1.49)<br>P=0.006 | 1.57<br>(1.15 to 2.13)<br>P=0.005 |
| Model 2: model 1 covariates, smoking status, pack-years | Ref.             | 1.12<br>(0.63 to 2.00)<br>P=0.700 | 2.71<br>(1.33 to 5.54)<br>P=0.006 | Ref.             | 1.25<br>(1.05 to 1.49)<br>P=0.014 | 1.43<br>(1.02 to 2.00)<br>P=0.039 | Ref.                | 1.25<br>(1.06 to 1.48)<br>P=0.009 | 1.60<br>(1.17 to 2.19)<br>P=0.003 |

Odds ratios for COPD<sub>symptoms</sub> were calculated using logistic regression with standard anatomy as the reference group. <sup>a</sup>Pooled analysis models include a term for study cohort. Participants with rare airway branch variants consisting of presence of the left medial-basal airway, or combinations of the above-mentioned variants are not shown (MESA: n=103; SPIROMICS: n=137).

Abbreviations: COPD<sub>symptoms</sub> = chronic obstructive pulmonary disease defined by an FEV<sub>1</sub>-to-FVC ratio below 0.7 and dyspnea or chronic bronchitis symptoms; FEV<sub>1</sub> = forced expired volume in one second; FVC = forced vital capacity; = MESA Multi-Ethnic Study of Atherosclerosis; SPIROMICS = Subpopulations and Intermediate Outcome Measures in COPD Study.

Table S7. Odds Ratios for COPD according to the presence of a tracheal or carinal airway in the MESA Lung Study, SPIROMICS and Both Studies Pooled.

|                                                         | MESA Lung                             |                                        | SPIROMICS                             |                                        | Pooled <sup>a</sup>                   |                                        |
|---------------------------------------------------------|---------------------------------------|----------------------------------------|---------------------------------------|----------------------------------------|---------------------------------------|----------------------------------------|
|                                                         | Absence of tracheal or carinal airway | Presence of tracheal or carinal airway | Absence of tracheal or carinal airway | Presence of tracheal or carinal airway | Absence of tracheal or carinal airway | Presence of tracheal or carinal airway |
| Participants with COPD                                  | 240                                   | 3                                      | 1,804                                 | 19                                     | 2,044                                 | 22                                     |
| Participants without COPD                               | 2,050                                 | 15                                     | 921                                   | 2                                      | 2,971                                 | 17                                     |
| Odds ratios for COPD                                    |                                       |                                        |                                       |                                        |                                       |                                        |
| Unadjusted model: airway branch variant status          | Ref.                                  | 1.65<br>(0.47 to 5.77)<br>P=0.432      | Ref.                                  | 4.38<br>(0.97 to 19.9)<br>P=0.060      | Ref.                                  | 2.57<br>(1.13 to 5.86)<br>P=0.024      |
| Model 1: age, gender, height, weight, race-ethnicity    | Ref.                                  | 1.32<br>(0.36 to 4.85)<br>P=0.673      | Ref.                                  | 3.70<br>(0.80 to 17.1)<br>P=0.095      | Ref.                                  | 2.11<br>(0.90 to 4.91)<br>P=0.086      |
| Model 2: model 1 covariates, smoking status, pack-years | Ref.                                  | 1.00<br>(0.22 to 4.53)<br>P=0.999      | Ref.                                  | 3.99<br>(0.84 to 19.0)<br>P=0.081      | Ref.                                  | 2.04<br>(0.84 to 4.94)<br>P=0.116      |

Odds ratios for COPD were calculated using logistic regression with absence of tracheal or carinal airway as the reference group. <sup>a</sup>Pooled analysis models include a term for study cohort.

Abbreviations: COPD = chronic obstructive pulmonary disease; = MESA Multi-Ethnic Study of Atherosclerosis; SPIROMICS = Subpopulations and Intermediate Outcome Measures in COPD Study



Table S8. Chronic Bronchitis and Dyspnea by Common Airway Branch Variants in the MESA Lung Study, SPIROMICS and Both Studies Pooled.

|                                                         | MESA Lung        |                                   |                                   | SPIROMICS <sup>a</sup> |                                   |                                   | Pooled <sup>b</sup> |                                   |                                   |
|---------------------------------------------------------|------------------|-----------------------------------|-----------------------------------|------------------------|-----------------------------------|-----------------------------------|---------------------|-----------------------------------|-----------------------------------|
|                                                         | Standard anatomy | Accessory sub-superior airway     | Absent right medial-basal airway  | Standard anatomy       | Accessory sub-superior airway     | Absent right medial-basal airway  | Standard anatomy    | Accessory sub-superior airway     | Absent right medial-basal airway  |
| Chronic bronchitis, N                                   | 167              | 35                                | 13                                | 340                    | 191                               | 37                                | 457                 | 226                               | 50                                |
| No Chronic bronchitis, N                                | 2,160            | 321                               | 123                               | 1,263                  | 577                               | 120                               | 2,858               | 898                               | 243                               |
| Odds ratio for chronic bronchitis                       |                  |                                   |                                   |                        |                                   |                                   |                     |                                   |                                   |
| Unadjusted                                              | Ref.             | 1.49<br>(1.00 to 2.21)<br>P=0.049 | 1.44<br>(0.79 to 2.63)<br>P=0.234 | Ref.                   | 1.23<br>(1.00 to 1.51)<br>P=0.045 | 1.15<br>(0.78 to 1.69)<br>P=0.492 | Ref.                | 1.25<br>(1.04 to 1.50)<br>P=0.017 | 1.17<br>(0.85 to 1.64)<br>P=0.330 |
| Model 1: age, gender, height, weight, race-ethnicity    | Ref.             | 1.38<br>(0.92 to 2.07)<br>P=0.115 | 1.55<br>(0.84 to 2.85)<br>P=0.160 | Ref.                   | 1.25<br>(1.02 to 1.54)<br>P=0.033 | 1.13<br>(0.76 to 1.67)<br>P=0.540 | Ref.                | 1.25<br>(1.04 to 1.50)<br>P=0.016 | 1.15<br>(0.83 to 1.61)<br>P=0.394 |
| Model 2: Model 1 covariates, smoking status, pack-years | Ref.             | 1.35<br>(0.90 to 2.03)<br>P=0.144 | 1.47<br>(0.79 to 2.71)<br>P=0.224 | Ref.                   | 1.32<br>(1.07 to 1.62)<br>P=0.010 | 1.17<br>(0.78 to 1.75)<br>P=0.442 | Ref.                | 1.31<br>(1.08 to 1.57)<br>P=0.005 | 1.16<br>(0.83 to 1.62)<br>P=0.400 |
| mMRC dyspnea score >0, N                                | 582              | 134                               | 58                                | 1,108                  | 543                               | 121                               | 1,690               | 677                               | 179                               |
| mMRC dyspnea = 0, N                                     | 1,726            | 369                               | 130                               | 533                    | 240                               | 41                                | 2,259               | 609                               | 171                               |
| Odds ratio for dyspnea                                  |                  |                                   |                                   |                        |                                   |                                   |                     |                                   |                                   |
| Unadjusted                                              | Ref.             | 1.08<br>(0.87 to 1.34)<br>P=0.507 | 1.32<br>(0.96 to 1.83)<br>P=0.089 | Ref.                   | 1.09<br>(0.91 to 1.31)<br>P=0.366 | 1.42<br>(0.98 to 2.05)<br>P=0.063 | Ref.                | 1.04<br>(0.90 to 1.20)<br>P=0.572 | 1.30<br>(1.01 to 1.66)<br>P=0.039 |
| Model 1: age, gender, height, weight, race-ethnicity    | Ref.             | 1.07<br>(0.85 to 1.34)<br>P=0.581 | 1.37<br>(0.97 to 1.93)<br>P=0.071 | Ref.                   | 1.15<br>(0.96 to 1.39)<br>P=0.134 | 1.55<br>(1.07 to 2.25)<br>P=0.022 | Ref.                | 1.08<br>(0.93 to 1.25)<br>P=0.314 | 1.38<br>(1.07 to 1.78)<br>P=0.014 |
| Model 2: Model 1 covariates, smoking status, pack-years | Ref.             | 1.05<br>(0.84 to 1.33)<br>P=0.661 | 1.34<br>(0.95 to 1.89)<br>P=0.093 | Ref.                   | 1.15<br>(0.95 to 1.39)<br>P=0.144 | 1.56<br>(1.07 to 2.26)<br>P=0.021 | Ref.                | 1.08<br>(0.93 to 1.25)<br>P=0.311 | 1.38<br>(1.07 to 1.78)<br>P=0.014 |

Odds ratios calculated using logistic regression. <sup>a</sup>SPIROMICS analysis models include a term for COPD status to reflect case-control design. <sup>b</sup>Pooled analysis models include a term indicating study cohort. There was no evidence of effect modification for symptom associations by cohort (p-interaction $\geq$ 0.457). Participants with rare airway branch variants consisting of presence of the left medial-basal airway, or combinations of the above-mentioned variants are not shown (MESA: n=103; SPIROMICS: n=137).

Table S9. Respiratory Health Status by Common Airway Branch Variants in SPIROMICS.

|                                                         | <b>Standard anatomy</b> | <b>Accessory sub-superior airway</b> | <b>Absent right medial-basal airway</b> |
|---------------------------------------------------------|-------------------------|--------------------------------------|-----------------------------------------|
| CAT score                                               | 13.9±8.3                | 14.7±8.4                             | 14.2±7.9                                |
| Mean differences in score                               |                         |                                      |                                         |
| Unadjusted                                              | Ref.                    | 0.8<br>(0.1 to 1.5)<br>P=0.031       | 0.3<br>(-1.0 to 1.7)<br>P=0.626         |
| Model 1: age, gender, height, weight, race-ethnicity    | Ref.                    | 0.5<br>(0.2 to 0.9)<br>P=0.005       | 0.3<br>(-0.4 to 1.0)<br>P=0.371         |
| Model 2: Model 1 covariates, smoking status, pack-years | Ref.                    | 1.1<br>(0.4 to 1.8)<br>P=0.002       | 0.7<br>(-0.6 to 2.0)<br>P=0.295         |
| Model 3: Model 2 covariates, COPD status                | Ref.                    | 0.9<br>(0.2 to 1.6)<br>P=0.008       | 0.1<br>(-1.2 to 1.4)<br>P=0.892         |
| SGRQ-C score                                            | 32.8±20.5               | 35.1±20.9                            | 34.1±20.2                               |
| Mean differences in score                               |                         |                                      |                                         |
| Unadjusted                                              | Ref.                    | 2.3<br>(0.5 to 4.1)<br>P=0.012       | 1.5<br>(-2.0 to 4.9)<br>P=0.400         |
| Model 1: age, gender, height, weight, race-ethnicity    | Ref.                    | 2.9<br>(1.1 to 4.7)<br>P=0.001       | 2.1<br>(-1.2 to 5.6)<br>P=0.210         |
| Model 2: Model 1 covariates, smoking status, pack-years | Ref.                    | 3.0<br>(1.2 to 4.7)<br>P=0.001       | 2.3<br>(-1.1 to 5.6)<br>P=0.181         |
| Model 2: Model 2 covariates, COPD status                | Ref.                    | 2.4<br>(0.8 to 4.0)<br>P=0.004       | 0.9<br>(-2.2 to 4.0)<br>P=0.582         |

Mean difference in respiratory health status scores calculated using linear regression. Participants with rare airway branch variants consisting of presence of the left medial-basal airway, or combinations of the above-mentioned variants are not shown (SPIROMICS: n=137).

Abbreviations: SPIROMICS = Subpopulations and Intermediate Outcome Measures in COPD Study; COPD = chronic obstructive pulmonary disease; CAT = COPD Assessment Test; SGRC-C St. George Respiratory Questionnaire for COPD.

Table S10. Respiratory Health Status by Common Airway Branch Variants among participants with COPD in SPIROMICS.

|                                                         | <b>Standard anatomy</b> | <b>Accessory sub-superior airway</b> | <b>Absent right medial-basal airway</b> |
|---------------------------------------------------------|-------------------------|--------------------------------------|-----------------------------------------|
| CAT score                                               | 15.3±7.9                | 16.1±8.2                             | 15.1±7.5                                |
| Mean differences in score                               |                         |                                      |                                         |
| Unadjusted                                              | Ref.                    | 0.8<br>(-0.1 to 1.6)<br>P=0.071      | -0.3<br>(-1.8 to 1.2)<br>P=0.732        |
| Model 1: age, gender, height, weight, race-ethnicity    | Ref.                    | 0.4<br>(0.3 to 1.9)<br>P=0.009       | 0.0<br>(-1.5 to 1.4)<br>P=0.947         |
| Model 2: Model 1 covariates, smoking status, pack-years | Ref.                    | 1.2<br>(0.4 to 2.0)<br>P=0.004       | -0.1<br>(-1.5 to 1.3)<br>P=0.905        |
| SGRQ-C score                                            | 37.2±19.7               | 39.7±20.0                            | 37.3±18.8                               |
| Mean differences in score                               |                         |                                      |                                         |
| Unadjusted                                              | Ref.                    | 2.6<br>(0.5 to 4.7)<br>P=0.016       | 0.1<br>(-3.7 to 3.9)<br>P=0.941         |
| Model 1: age, gender, height, weight, race-ethnicity    | Ref.                    | 3.5<br>(1.6 to 5.5)<br>P<0.001       | 0.6<br>(-3.0 to 4.1)<br>P=0.748         |
| Model 2: Model 1 covariates, smoking status, pack-years | Ref.                    | 3.6<br>(1.6 to 5.5)<br>P<0.001       | 0.6<br>(-2.9 to 4.1)<br>P=0.751         |

Mean difference in respiratory health status scores calculated using linear regression. Participants with rare airway branch variants consisting of presence of the left medial-basal airway, or combinations of the above-mentioned variants are not shown (SPIROMICS: n=137).

Abbreviations: SPIROMICS = Subpopulations and Intermediate Outcome Measures in COPD Study; COPD = chronic obstructive pulmonary disease; CAT = COPD Assessment Test; SGRC-C St. George Respiratory Questionnaire for COPD.

Table S11. Percent Emphysema by Common Airway Branch Variants in the MESA Lung Study, SPIROMICS and Both Studies Pooled.

|                                                                                    | MESA Lung         |                                 |                                  | SPIROMICS         |                                |                                  | Pooled <sup>a</sup> |                                |                                  |
|------------------------------------------------------------------------------------|-------------------|---------------------------------|----------------------------------|-------------------|--------------------------------|----------------------------------|---------------------|--------------------------------|----------------------------------|
|                                                                                    | Standard anatomy  | Accessory sub-superior airway   | Absent right medial-basal airway | Standard anatomy  | Accessory sub-superior airway  | Absent right medial-basal airway | Standard anatomy    | Accessory sub-superior airway  | Absent right medial-basal airway |
| Percent emphysema (25 <sup>th</sup> , 75 <sup>th</sup> %ile)                       | 1.2<br>(0.5, 2.6) | 1.3<br>(0.6, 2.8)               | 1.2<br>(0.4, 2.8)                | 2.8<br>(0.9, 9.6) | 4.0<br>(1.3, 14.8)             | 3.9<br>(1.5, 11.4)               | 1.8<br>(0.6, 4.6)   | 2.8<br>(1.0, 9.1)              | 2.2<br>(0.7, 6.5)                |
| Mean difference in percent emphysema                                               |                   |                                 |                                  |                   |                                |                                  |                     |                                |                                  |
| Unadjusted                                                                         | Ref.              | 0.1<br>(-0.1 to 0.3)<br>P=0.198 | -0.1<br>(-0.3 to 0.1)<br>P=0.401 | Ref.              | 1.2<br>(0.7 to 1.8)<br>P<0.001 | 1.1<br>(0.3 to 2.1)<br>P=0.008   | Ref.                | 0.6<br>(0.3 to 0.8)<br>P<0.001 | 0.3<br>(-0.1 to 0.6)<br>P=0.101  |
| Model 1: age, gender, height, weight, race-ethnicity, CT model, dose               | Ref.              | 0.1<br>(0.0 to 0.2)<br>P=0.111  | -0.1<br>(-0.2 to 0.1)<br>P=0.213 | Ref.              | 0.8<br>(0.4 to 1.2)<br>P<0.001 | 0.5<br>(-0.2 to 1.4)<br>P=0.135  | Ref.                | 0.4<br>(0.2 to 0.6)<br>P<0.001 | 0.1<br>(-0.2 to 0.4)<br>P=0.532  |
| Model 2: model 1 covariates, smoking status, pack-years                            | Ref.              | 0.1<br>(0.0 to 0.2)<br>P=0.174  | -0.1<br>(-0.2 to 0.1)<br>P=0.308 | Ref.              | 0.7<br>(0.3 to 1.1)<br>P<0.001 | 0.5<br>(-0.2 to 1.3)<br>P=0.154  | Ref.                | 0.3<br>(0.2 to 0.5)<br>P<0.001 | 0.1<br>(-0.1 to 0.4)<br>P=0.420  |
| Upper and middle lobe percent emphysema (25 <sup>th</sup> , 75 <sup>th</sup> %ile) | 1.3 (0.6, 3.1)    | 1.4 (0.6, 3.1)                  | 1.2 (0.4, 3.0)                   | 3.0 (0.9, 10.5)   | 4.3 (1.3, 16.2)                | 4.1 (1.3, 13.1)                  | 2.0 (0.7, 5.2)      | 3.1 (1.0, 10.0)                | 2.4 (0.8, 6.6)                   |
| Mean difference in upper lobe percent emphysema                                    |                   |                                 |                                  |                   |                                |                                  |                     |                                |                                  |
| Unadjusted                                                                         | Ref.              | 0.1<br>(-0.1 to 0.3)<br>P=0.255 | -0.1<br>(-0.3 to 0.2)<br>P=0.468 | Ref.              | 1.3<br>(0.8 to 1.9)<br>P<0.001 | 1.1<br>(0.2 to 2.3)<br>P=0.012   | Ref.                | 0.6<br>(0.4 to 0.9)<br>P<0.001 | 0.3<br>(-0.1 to 0.7)<br>P=0.112  |
| Model 1: age, gender, height, weight, race-ethnicity, CT model, dose               | Ref.              | 0.1<br>(0.0 to 0.2)<br>P=0.121  | -0.1<br>(-0.3 to 0.1)<br>P=0.171 | Ref.              | 0.9<br>(0.4 to 1.4)<br>P<0.001 | 0.5<br>(-0.2 to 1.5)<br>P=0.174  | Ref.                | 0.4<br>(0.3 to 0.7)<br>P<0.001 | 0.1<br>(-0.2 to 0.4)<br>P=0.671  |
| Model 2: model 1 covariates, smoking status, pack-years                            | Ref.              | 0.1<br>(0.0 to 0.2)<br>P=0.180  | -0.1<br>(-0.3 to 0.1)<br>P=0.272 | Ref.              | 0.7<br>(0.3 to 1.2)<br>P<0.001 | 0.5<br>(-0.2 to 1.4)<br>P=0.199  | Ref.                | 0.4<br>(0.2 to 0.6)<br>P<0.001 | 0.1<br>(-0.2 to 0.4)<br>P=0.550  |

|                                                                         |                |                                |                                  |                |                                |                                 |                |                                |                                 |
|-------------------------------------------------------------------------|----------------|--------------------------------|----------------------------------|----------------|--------------------------------|---------------------------------|----------------|--------------------------------|---------------------------------|
| Lower lobe percent emphysema (25 <sup>th</sup> , 75 <sup>th</sup> %ile) | 0.9 (0.4, 2.1) | 1.0 (0.5, 2.4)                 | 0.8 (0.3, 2.4)                   | 2.2 (0.7, 6.7) | 3.1 (1.0, 10.4)                | 3.0 (1.0, 8.9)                  | 1.4 (0.5, 3.4) | 2.2 (0.7, 6.6)                 | 1.7 (0.5, 4.5)                  |
| Mean difference in lower lobe percent emphysema                         |                |                                |                                  |                |                                |                                 |                |                                |                                 |
| Unadjusted                                                              | Ref.           | 0.1<br>(0.0 to 0.3)<br>P=0.121 | -0.1<br>(-0.3 to 0.1)<br>P=0.218 | Ref.           | 0.9<br>(0.5 to 1.3)<br>P<0.001 | 0.8<br>(0.2 to 1.6)<br>P=0.012  | Ref.           | 0.4<br>(0.3 to 0.6)<br>P<0.001 | 0.2<br>(-0.1 to 0.4)<br>P=0.204 |
| Model 1: age, gender, height, weight, race-ethnicity, CT model, dose    | Ref.           | 0.1<br>(0.0 to 0.2)<br>P=0.128 | -0.1<br>(-0.2 to 0.1)<br>P=0.241 | Ref.           | 0.6<br>(0.3 to 0.9)<br>P<0.001 | 0.4<br>(-0.2 to 1.0)<br>P=0.189 | Ref.           | 0.3<br>(0.2 to 0.5)<br>P<0.001 | 0.1<br>(-0.2 to 0.3)<br>P=0.590 |
| Model 2: model 1 covariates, smoking status, pack-years                 | Ref.           | 0.1<br>(0.0 to 0.2)<br>P=0.195 | -0.1<br>(-0.2 to 0.1)<br>P=0.318 | Ref.           | 0.5<br>(0.2 to 0.8)<br>P<0.001 | 0.3<br>(-0.2 to 0.9)<br>P=0.217 | Ref.           | 0.3<br>(0.1 to 0.4)<br>P<0.001 | 0.1<br>(-0.1 to 0.3)<br>P=0.479 |

Predicted mean differences calculated using linear regression with log-transformation of percent emphysema variable. Participants with rare airway branch variants consisting of presence of the left medial-basal airway, or combinations of the above-mentioned variants are not shown (MESA: n=103; SPIROMICS: n=137). <sup>a</sup>Combined logistic regression models include a term for study cohort, and there was no evidence of interaction by study (p-interaction=0.190).

Abbreviations: MESA = Multi-Ethnic Study of Atherosclerosis; SPIROMICS = Subpopulations and Intermediate Outcome Measures in COPD Study; COPD = chronic obstructive pulmonary disease; CT = computed tomography.

Table S12. Characteristics of MESA COPD Participants Included in the Matched Case-Control Comparison of Apparent Diffusion Coefficients between among Common Airway Branch Variants and Standard Anatomy.

|                          | <b>Accessory<br/>sub-superior airway cases</b><br>N=10 | <b>Standard<br/>anatomy matched controls</b><br>N=10 | <b>Absent right<br/>medial-basal cases</b><br>N=2 | <b>Standard<br/>anatomy matched controls</b><br>N=8 |
|--------------------------|--------------------------------------------------------|------------------------------------------------------|---------------------------------------------------|-----------------------------------------------------|
| Age – years              | 71.2±4.4                                               | 64.6±7.2                                             | 66.0±7.1                                          | 64.3±6.8                                            |
| Male – %                 | 60                                                     | 60                                                   | 50                                                | 50                                                  |
| Height – cm              | 168.8±12.2                                             | 170.5±8.1                                            | 165.8±11.0                                        | 166.9±8.1                                           |
| Weight – kg              | 71.0±12.8                                              | 82.9±8.1                                             | 73.2±35.6                                         | 79.3±9.2                                            |
| Smoking status – %       |                                                        |                                                      |                                                   |                                                     |
| Non-smoker               | 0.0                                                    | 0.0                                                  | 0.0                                               | 0.0                                                 |
| Former                   | 90.0                                                   | 70.0                                                 | 50.0                                              | 50.0                                                |
| Current                  | 10.0                                                   | 30.0                                                 | 50.0                                              | 50.0                                                |
| Pack-years               | 46.1±16.3                                              | 30.9±11.2                                            | 30.9±11.2                                         | 30.9±11.2                                           |
| COPD – %                 | 60.0                                                   | 60.0                                                 | 0.0                                               | 0.0                                                 |
| CT lung volume – L       | 5.1±1.4                                                | 5.3±1.3                                              | 4.0±0.3                                           | 4.5±1.1                                             |
| CT percent emphysema – % | 1.8 (0.6, 9.3)                                         | 2.3 (0.3, 4.1)                                       | 0.2 (0.1, 0.2)                                    | 0.4 (0.2, 1.8)                                      |

Values represent mean ± SD, percentages, or median (25th, 75th percentile). Of 60 MESA COPD participants performing inhaled hyper-polarized Helium-3 magnetic resonance imaging, 10 participants had an accessory sub-superior airway and were matched 1:1 with 10 standard anatomy participants; and two participants had an absent right medial-basal airway and were matched 1:4 with standard anatomy. Participants were matched for gender, height within 5 cm, and COPD status. Abbreviations: MESA = Multi-Ethnic Study of Atherosclerosis; COPD = chronic obstructive pulmonary disease; CT = computed tomograph.

Table S13. Candidate single nucleotide polymorphisms and associations with common airway branch variants.

| ID            | Candidate SNP |           |        |              | Absent right medial basal airway |                                 |            |         | Accessory sub-superior airway |                                 |            |         |
|---------------|---------------|-----------|--------|--------------|----------------------------------|---------------------------------|------------|---------|-------------------------------|---------------------------------|------------|---------|
|               | Chr           | Base-pair | Gene   | Minor allele | Frequency in cases (n=172)       | Frequency in controls (n=2,425) | Odds ratio | P-value | Frequency in cases (n=398)    | Frequency in controls (n=2,199) | Odds ratio | P-value |
| SNP_A-8479304 | 1             | 92187060  | TGFBR3 | A            | 0.052                            | 0.070                           | 1.00       | 0.9989  | 0.069                         | 0.068                           | 0.94       | 0.7273  |
| SNP_A-2308322 | 1             | 92213527  | TGFBR3 | T            | 0.227                            | 0.246                           | 0.93       | 0.7325  | 0.253                         | 0.243                           | 1.13       | 0.1870  |
| SNP_A-8393565 | 1             | 92250552  | TGFBR3 | A            | 0.521                            | 0.496                           | 1.02       | 0.8669  | 0.514                         | 0.494                           | 1.07       | 0.3826  |
| SNP_A-8301470 | 1             | 92281991  | TGFBR3 | A            | 0.177                            | 0.180                           | 1.18       | 0.6406  | 0.202                         | 0.175                           | 0.99       | 0.9121  |
| SNP_A-8287930 | 1             | 92298266  | TGFBR3 | A            | 0.035                            | 0.060                           | 0.86       | 0.6382  | 0.046                         | 0.061                           | 0.83       | 0.3105  |
| SNP_A-8582062 | 2             | 16082877  | MYCN   | A            | 0.398                            | 0.357                           | 1.09       | 0.4812  | 0.382                         | 0.356                           | 1.24       | 0.0101  |
| SNP_A-8322660 | 2             | 16086709  | MYCN   | G            | 0.195                            | 0.191                           | 1.09       | 0.7188  | 0.226                         | 0.185                           | 1.34       | 0.0038  |
| SNP_A-4230064 | 2             | 16086822  | MYCN   | A            | 0.343                            | 0.325                           | 1.15       | 0.2436  | 0.368                         | 0.318                           | 1.30       | 0.0019  |
| SNP_A-1972100 | 3             | 25246269  | RARB   | A            | 0.180                            | 0.212                           | 0.96       | 0.8683  | 0.219                         | 0.208                           | 1.09       | 0.3986  |
| SNP_A-8422094 | 3             | 25269521  | RARB   | C            | 0.085                            | 0.095                           | 0.89       | 0.5618  | 0.082                         | 0.097                           | 0.92       | 0.7360  |
| SNP_A-8469803 | 3             | 25288713  | RARB   | A            | 0.067                            | 0.054                           | 1.31       | 0.2986  | 0.043                         | 0.057                           | 0.90       | 0.5766  |
| SNP_A-8458446 | 3             | 25288892  | RARB   | A            | 0.218                            | 0.241                           | 0.93       | 0.5938  | 0.236                         | 0.240                           | 1.03       | 0.8925  |
| SNP_A-4198192 | 3             | 25294831  | RARB   | G            | 0.454                            | 0.497                           | 1.00       | 0.9998  | 0.494                         | 0.494                           | 0.97       | 0.8151  |
| SNP_A-1972103 | 3             | 25304837  | RARB   | A            | 0.317                            | 0.387                           | 0.87       | 0.3839  | 0.368                         | 0.385                           | 0.92       | 0.3425  |
| SNP_A-8547579 | 3             | 25308579  | RARB   | T            | 0.119                            | 0.118                           | 1.08       | 0.6954  | 0.126                         | 0.117                           | 0.93       | 0.5758  |
| SNP_A-4237352 | 3             | 25312406  | RARB   | A            | 0.206                            | 0.218                           | 1.07       | 0.6104  | 0.215                         | 0.217                           | 0.90       | 0.3008  |
| SNP_A-8384819 | 3             | 25319855  | RARB   | T            | 0.201                            | 0.179                           | 1.21       | 0.3137  | 0.188                         | 0.179                           | 1.01       | 0.9570  |
| SNP_A-1972106 | 3             | 25324438  | RARB   | G            | 0.113                            | 0.136                           | 0.99       | 0.9472  | 0.143                         | 0.133                           | 0.92       | 0.5223  |
| SNP_A-8413380 | 3             | 25341148  | RARB   | C            | 0.105                            | 0.114                           | 1.03       | 0.8705  | 0.129                         | 0.110                           | 0.92       | 0.5163  |
| SNP_A-8450623 | 3             | 25342145  | RARB   | T            | 0.172                            | 0.205                           | 1.00       | 0.9825  | 0.207                         | 0.202                           | 1.03       | 0.8530  |
| SNP_A-8617871 | 3             | 25356640  | RARB   | G            | 0.384                            | 0.404                           | 0.96       | 0.7973  | 0.389                         | 0.405                           | 0.89       | 0.3647  |
| SNP_A-2199859 | 3             | 25361022  | RARB   | C            | 0.142                            | 0.161                           | 1.02       | 0.9469  | 0.160                         | 0.160                           | 0.99       | 0.9355  |
| SNP_A-2122555 | 3             | 25361700  | RARB   | G            | 0.052                            | 0.079                           | 0.91       | 0.6987  | 0.096                         | 0.074                           | 1.33       | 0.0417  |
| SNP_A-8588493 | 3             | 25365433  | RARB   | G            | 0.343                            | 0.335                           | 1.04       | 0.7400  | 0.324                         | 0.338                           | 0.93       | 0.5942  |
| SNP_A-8630435 | 3             | 25366352  | RARB   | G            | 0.087                            | 0.086                           | 1.03       | 0.8882  | 0.077                         | 0.088                           | 0.89       | 0.4582  |
| SNP_A-8493534 | 3             | 25367584  | RARB   | C            | 0.122                            | 0.125                           | 1.12       | 0.5674  | 0.104                         | 0.129                           | 0.81       | 0.0981  |
| SNP_A-4263402 | 3             | 25389941  | RARB   | G            | 0.058                            | 0.083                           | 0.94       | 0.8080  | 0.079                         | 0.081                           | 0.92       | 0.5831  |



|               |   |          |      |   |       |       |      |        |       |       |      |        |
|---------------|---|----------|------|---|-------|-------|------|--------|-------|-------|------|--------|
| SNP_A-4299684 | 3 | 25401979 | RARB | C | 0.140 | 0.160 | 0.98 | 0.9229 | 0.145 | 0.161 | 0.87 | 0.2258 |
| SNP_A-4302257 | 3 | 25403332 | RARB | C | 0.047 | 0.077 | 0.77 | 0.3269 | 0.072 | 0.075 | 0.90 | 0.4801 |
| SNP_A-4249225 | 3 | 25414158 | RARB | T | 0.076 | 0.131 | 0.71 | 0.1641 | 0.143 | 0.124 | 1.10 | 0.4974 |
| SNP_A-8322291 | 3 | 25422607 | RARB | T | 0.317 | 0.330 | 0.90 | 0.5256 | 0.310 | 0.332 | 0.92 | 0.4129 |
| SNP_A-2256758 | 3 | 25424654 | RARB | G | 0.128 | 0.113 | 0.99 | 0.9566 | 0.126 | 0.112 | 1.16 | 0.2195 |
| SNP_A-8484191 | 3 | 25428560 | RARB | C | 0.113 | 0.134 | 0.92 | 0.6591 | 0.160 | 0.128 | 1.06 | 0.6143 |
| SNP_A-8380804 | 3 | 25429670 | RARB | C | 0.038 | 0.070 | 0.62 | 0.1010 | 0.065 | 0.068 | 0.84 | 0.2595 |
| SNP_A-8429777 | 3 | 25429952 | RARB | T | 0.361 | 0.418 | 0.87 | 0.3058 | 0.418 | 0.413 | 0.89 | 0.2377 |
| SNP_A-4253644 | 3 | 25430406 | RARB | T | 0.323 | 0.350 | 0.95 | 0.6829 | 0.355 | 0.347 | 0.94 | 0.5840 |
| SNP_A-1836266 | 3 | 25435600 | RARB | T | 0.424 | 0.435 | 1.00 | 0.9860 | 0.396 | 0.442 | 0.92 | 0.3128 |
| SNP_A-8696572 | 3 | 25450840 | RARB | C | 0.076 | 0.059 | 1.25 | 0.3920 | 0.069 | 0.058 | 1.23 | 0.2104 |
| SNP_A-1956297 | 3 | 25450886 | RARB | T | 0.084 | 0.077 | 1.56 | 0.2896 | 0.092 | 0.075 | 1.16 | 0.4686 |
| SNP_A-8457815 | 3 | 25454782 | RARB | G | 0.273 | 0.283 | 0.88 | 0.5518 | 0.250 | 0.288 | 0.97 | 0.8289 |
| SNP_A-8322584 | 3 | 25454987 | RARB | T | 0.137 | 0.132 | 1.09 | 0.6101 | 0.138 | 0.131 | 1.06 | 0.7068 |
| SNP_A-8307693 | 3 | 25455112 | RARB | T | 0.052 | 0.053 | 1.20 | 0.4723 | 0.052 | 0.053 | 1.13 | 0.5000 |
| SNP_A-8609948 | 3 | 25455648 | RARB | T | 0.259 | 0.268 | 0.95 | 0.7414 | 0.283 | 0.265 | 1.09 | 0.3504 |
| SNP_A-8712629 | 3 | 25455682 | RARB | C | 0.381 | 0.393 | 0.97 | 0.7867 | 0.377 | 0.395 | 0.95 | 0.6263 |
| SNP_A-8650725 | 3 | 25466972 | RARB | T | 0.336 | 0.311 | 1.12 | 0.3638 | 0.322 | 0.311 | 0.93 | 0.4141 |
| SNP_A-2008549 | 3 | 25483432 | RARB | A | 0.297 | 0.361 | 0.81 | 0.2245 | 0.391 | 0.351 | 1.11 | 0.1927 |
| SNP_A-8351129 | 3 | 25485859 | RARB | C | 0.247 | 0.193 | 1.22 | 0.1390 | 0.187 | 0.198 | 0.86 | 0.2394 |
| SNP_A-8580532 | 3 | 25491926 | RARB | T | 0.298 | 0.260 | 1.05 | 0.6971 | 0.252 | 0.264 | 1.06 | 0.5116 |
| SNP_A-8649631 | 3 | 25495306 | RARB | C | 0.087 | 0.079 | 0.88 | 0.7612 | 0.080 | 0.080 | 1.02 | 0.9276 |
| SNP_A-8529905 | 3 | 25502657 | RARB | C | 0.390 | 0.378 | 0.95 | 0.6909 | 0.362 | 0.382 | 1.00 | 0.9740 |
| SNP_A-8376699 | 3 | 25507429 | RARB | T | 0.154 | 0.218 | 0.69 | 0.1203 | 0.205 | 0.215 | 1.02 | 0.8232 |
| SNP_A-2075948 | 3 | 25516574 | RARB | A | 0.500 | 0.462 | 1.09 | 0.4429 | 0.480 | 0.462 | 0.96 | 0.7406 |
| SNP_A-2200732 | 3 | 25520472 | RARB | G | 0.076 | 0.054 | 1.68 | 0.0201 | 0.062 | 0.054 | 1.00 | 0.9987 |
| SNP_A-1924712 | 3 | 25521223 | RARB | G | 0.084 | 0.135 | 0.68 | 0.2581 | 0.131 | 0.132 | 1.15 | 0.2461 |
| SNP_A-2136180 | 3 | 25523735 | RARB | C | 0.073 | 0.063 | 0.93 | 0.8717 | 0.069 | 0.062 | 1.20 | 0.5911 |
| SNP_A-8525553 | 3 | 25539902 | RARB | T | 0.078 | 0.080 | 1.38 | 0.1383 | 0.079 | 0.080 | 0.96 | 0.7667 |
| SNP_A-8464443 | 3 | 25543516 | RARB | T | 0.102 | 0.113 | 1.29 | 0.4402 | 0.104 | 0.114 | 0.78 | 0.1899 |
| SNP_A-8679869 | 3 | 25544885 | RARB | G | 0.142 | 0.126 | 1.10 | 0.5596 | 0.129 | 0.127 | 1.10 | 0.4012 |

|                               |   |           |        |   |              |              |             |                 |       |       |      |        |
|-------------------------------|---|-----------|--------|---|--------------|--------------|-------------|-----------------|-------|-------|------|--------|
| SNP_A-2301558                 | 3 | 25559838  | RARB   | T | 0.140        | 0.196        | 0.69        | 0.2075          | 0.197 | 0.192 | 1.10 | 0.4691 |
| SNP_A-8398268                 | 3 | 25573913  | RARB   | A | 0.247        | 0.272        | 0.90        | 0.6370          | 0.263 | 0.272 | 1.06 | 0.7101 |
| SNP_A-1972114                 | 3 | 25577736  | RARB   | G | 0.381        | 0.361        | 1.11        | 0.3699          | 0.327 | 0.368 | 0.89 | 0.1835 |
| SNP_A-2031641                 | 3 | 25580105  | RARB   | C | 0.077        | 0.056        | 1.66        | 0.0228          | 0.065 | 0.056 | 1.08 | 0.8078 |
| SNP_A-1892342                 | 3 | 25580286  | RARB   | C | 0.273        | 0.252        | 0.96        | 0.8330          | 0.220 | 0.259 | 0.88 | 0.1700 |
| SNP_A-4201754                 | 3 | 25580890  | RARB   | C | 0.209        | 0.180        | 1.03        | 0.8259          | 0.161 | 0.186 | 0.80 | 0.3543 |
| SNP_A-8617876                 | 3 | 25583580  | RARB   | A | 0.094        | 0.075        | 1.11        | 0.5783          | 0.088 | 0.074 | 1.10 | 0.4913 |
| SNP_A-1972115                 | 3 | 25586156  | RARB   | G | 0.087        | 0.096        | 1.06        | 0.8158          | 0.080 | 0.098 | 0.90 | 0.4780 |
| SNP_A-8445018                 | 3 | 25594924  | RARB   | G | 0.445        | 0.399        | 1.20        | 0.1111          | 0.390 | 0.404 | 0.96 | 0.6546 |
| SNP_A-4302121                 | 3 | 25594939  | RARB   | T | 0.154        | 0.117        | 1.26        | 0.1452          | 0.136 | 0.116 | 1.08 | 0.5296 |
| SNP_A-8602060                 | 3 | 25595136  | RARB   | C | 0.288        | 0.272        | 1.11        | 0.4248          | 0.246 | 0.278 | 0.90 | 0.3686 |
| SNP_A-2270367                 | 3 | 25595237  | RARB   | A | 0.503        | 0.503        | 0.90        | 0.3914          | 0.511 | 0.501 | 1.01 | 0.9407 |
| SNP_A-1889370                 | 3 | 25598744  | RARB   | G | 0.090        | 0.086        | 1.19        | 0.5154          | 0.073 | 0.088 | 0.92 | 0.5998 |
| SNP_A-8429379                 | 3 | 25605070  | RARB   | T | 0.329        | 0.289        | 1.27        | 0.0512          | 0.288 | 0.292 | 1.05 | 0.5553 |
| SNP_A-8325698                 | 3 | 25605535  | RARB   | G | 0.180        | 0.176        | 0.99        | 0.9691          | 0.173 | 0.177 | 0.99 | 0.9311 |
| SNP_A-2053513                 | 3 | 25607898  | RARB   | T | 0.192        | 0.176        | 1.04        | 0.7776          | 0.177 | 0.177 | 1.00 | 0.9872 |
| SNP_A-8305517                 | 3 | 25624107  | RARB   | C | 0.174        | 0.146        | 1.09        | 0.5710          | 0.142 | 0.149 | 0.93 | 0.5464 |
| AFFX-SNP_10538716             | 3 | 25627507  | RARB   | G | 0.349        | 0.336        | 1.12        | 0.3249          | 0.336 | 0.337 | 1.05 | 0.5841 |
| SNP_A-1866350                 | 3 | 41237448  | CTNNB1 | C | 0.398        | 0.379        | 1.14        | 0.2869          | 0.408 | 0.375 | 1.07 | 0.5009 |
| SNP_A-4206193                 | 3 | 41268711  | CTNNB1 | A | 0.429        | 0.447        | 0.85        | 0.1651          | 0.458 | 0.444 | 1.03 | 0.7416 |
| SNP_A-8594543                 | 4 | 145638960 | HHIP   | T | 0.352        | 0.372        | 0.90        | 0.4883          | 0.372 | 0.371 | 1.01 | 0.9108 |
| SNP_A-2250194                 | 4 | 145643418 | HHIP   | C | 0.352        | 0.285        | 1.26        | 0.0530          | 0.295 | 0.289 | 0.95 | 0.6057 |
| SNP_A-1876176                 | 4 | 145652902 | HHIP   | T | 0.241        | 0.238        | 0.88        | 0.5410          | 0.250 | 0.236 | 1.09 | 0.3965 |
| SNP_A-8363286                 | 5 | 44308353  | FGF10  | C | 0.444        | 0.359        | 1.40        | 0.0126          | 0.320 | 0.373 | 0.81 | 0.0137 |
| SNP_A-8415986                 | 5 | 44314920  | FGF10  | C | 0.105        | 0.134        | 0.83        | 0.4318          | 0.150 | 0.129 | 1.03 | 0.8144 |
| SNP_A-8616840                 | 5 | 44316591  | FGF10  | A | 0.061        | 0.100        | 0.59        | 0.0292          | 0.131 | 0.091 | 1.24 | 0.0826 |
| SNP_A-1957063                 | 5 | 44341272  | FGF10  | A | 0.285        | 0.229        | 1.30        | 0.0464          | 0.215 | 0.236 | 0.90 | 0.2622 |
| SNP_A-1981468                 | 5 | 44344655  | FGF10  | T | 0.078        | 0.059        | 1.50        | 0.0587          | 0.059 | 0.060 | 0.87 | 0.4692 |
| SNP_A-8665560<br>(rs980510)   | 5 | 44354289  | FGF10  | T | <b>0.564</b> | <b>0.447</b> | <b>1.63</b> | <b>3.95E-05</b> | 0.411 | 0.463 | 0.94 | 0.6020 |
| SNP_A-8665561<br>(rs10512844) | 5 | 44374516  | FGF10  | A | <b>0.411</b> | <b>0.308</b> | <b>1.58</b> | <b>1.43E-04</b> | 0.297 | 0.318 | 0.88 | 0.1452 |

|               |    |           |       |   |       |       |      |        |       |       |      |        |
|---------------|----|-----------|-------|---|-------|-------|------|--------|-------|-------|------|--------|
| SNP_A-2312179 | 6  | 43745041  | VEGFA | A | 0.082 | 0.106 | 0.88 | 0.5648 | 0.102 | 0.105 | 1.14 | 0.3680 |
| SNP_A-2205423 | 6  | 43746614  | VEGFA | T | 0.090 | 0.087 | 0.92 | 0.6709 | 0.077 | 0.090 | 1.04 | 0.8143 |
| SNP_A-8553366 | 10 | 123258879 | FGFR2 | C | 0.244 | 0.271 | 0.90 | 0.4958 | 0.261 | 0.271 | 0.94 | 0.4730 |
| SNP_A-8334743 | 10 | 123315745 | FGFR2 | T | 0.430 | 0.407 | 1.02 | 0.8871 | 0.426 | 0.406 | 1.08 | 0.3523 |
| SNP_A-8461231 | 10 | 123316636 | FGFR2 | A | 0.535 | 0.457 | 1.30 | 0.0250 | 0.475 | 0.460 | 1.10 | 0.2414 |
| SNP_A-1863115 | 10 | 123328965 | FGFR2 | C | 0.326 | 0.329 | 0.97 | 0.8055 | 0.384 | 0.319 | 1.21 | 0.0206 |
| SNP_A-8601379 | 10 | 123336106 | FGFR2 | G | 0.416 | 0.464 | 0.92 | 0.5486 | 0.493 | 0.455 | 1.22 | 0.0768 |
| SNP_A-8483184 | 10 | 123338345 | FGFR2 | A | 0.195 | 0.210 | 1.09 | 0.6629 | 0.234 | 0.205 | 1.11 | 0.2734 |
| SNP_A-1925966 | 10 | 123344716 | FGFR2 | G | 0.186 | 0.202 | 0.83 | 0.3266 | 0.210 | 0.199 | 1.17 | 0.1021 |
| SNP_A-1936059 | 13 | 22248509  | FGF9  | A | 0.297 | 0.293 | 0.94 | 0.5980 | 0.314 | 0.289 | 1.03 | 0.7590 |
| SNP_A-8690066 | 13 | 22255136  | FGF9  | T | 0.483 | 0.448 | 1.07 | 0.5373 | 0.438 | 0.452 | 1.02 | 0.8054 |
| SNP_A-8471080 | 13 | 22263589  | FGF9  | C | 0.125 | 0.114 | 0.93 | 0.6943 | 0.097 | 0.118 | 0.81 | 0.1350 |
| SNP_A-8471082 | 13 | 22264747  | FGF9  | G | 0.175 | 0.183 | 0.96 | 0.8349 | 0.218 | 0.177 | 1.18 | 0.2921 |
| SNP_A-1800292 | 13 | 22269474  | FGF9  | G | 0.238 | 0.261 | 0.93 | 0.5932 | 0.284 | 0.255 | 0.99 | 0.9380 |
| SNP_A-8680551 | 13 | 22271503  | FGF9  | C | 0.439 | 0.414 | 1.02 | 0.8848 | 0.388 | 0.420 | 0.95 | 0.5245 |
| SNP_A-8449796 | 14 | 76447869  | TGFB3 | C | 0.064 | 0.069 | 0.92 | 0.8700 | 0.069 | 0.069 | 1.06 | 0.7294 |
| SNP_A-2223781 | 20 | 60890723  | LAMA5 | T | 0.044 | 0.048 | 0.97 | 0.9021 | 0.047 | 0.048 | 0.81 | 0.2656 |
| SNP_A-2306205 | 20 | 60899589  | LAMA5 | A | 0.192 | 0.190 | 1.20 | 0.2058 | 0.195 | 0.190 | 1.01 | 0.9058 |
| SNP_A-8349966 | 20 | 60915757  | LAMA5 | C | 0.368 | 0.375 | 1.04 | 0.7383 | 0.353 | 0.379 | 0.91 | 0.2545 |
| SNP_A-8403925 | 20 | 60916487  | LAMA5 | C | 0.244 | 0.263 | 0.81 | 0.3875 | 0.246 | 0.265 | 0.93 | 0.6445 |
| SNP_A-1860446 | 20 | 60932842  | LAMA5 | A | 0.093 | 0.110 | 0.82 | 0.3102 | 0.120 | 0.107 | 1.02 | 0.8954 |

Candidate SNPs were selected *a priori* based on their location within genes implicated in airway morphogenesis. Genotyping: Affymetrix 6.0, excluding MAF<0.5, missingness per SNP >0.1, missingness per subject >0.1, and linkage disequilibrium >0.7. The degree of linkage disequilibrium below 0.7 is depicted by the r2 color scale. Odds ratios and p-values calculated using logistic regression analyses stratified by race-ethnicity, adjusted for gender, genetic ancestry principle components, and pooled by random effects meta-analysis. Bonferroni p-threshold of significance: 4.59E-04. SNP denotes single nucleotide polymorphism.

Table S14. Replication of FGF10 polymorphism rs980510 and absence of the right medial-basal airway in SPIROMICS.

|                      | <b>Chromosome</b> | <b>SNP</b> | <b>Gene</b> | <b>Minor allele</b> | <b>Frequency</b> | <b>Standard anatomy</b> | <b>Absence of the right medial-basal airway</b> | <b>Odds ratio</b> | <b>p-value</b> |
|----------------------|-------------------|------------|-------------|---------------------|------------------|-------------------------|-------------------------------------------------|-------------------|----------------|
| Whites               | 5                 | rs980510   | FGF10       | T                   | 0.382            | 1,122                   | 73                                              | 1.46              | 0.0096         |
| All race-ethnicities | 5                 | rs980510   | FGF10       | T                   | 0.366            | 1,456                   | 95                                              | 1.42              | 0.0086         |

Genotype data for the SPIROMICS sample was derived from OmniExpress plus Exome GeneChip (Illumina; San Diego, CA). Because this sample was predominantly White, the main analysis was restricted to Whites, adjusting for gender, and principal components of genetic ancestry. Secondary analysis included all race-ethnicities and an additional adjustment term for race.

Table S15. Intra-class correlation coefficients for quantitative CT measures in the SPIROMICS Reproducibility Substudy.

|                             | <b>Intra-class<br/>correlation<br/>coefficient</b> |
|-----------------------------|----------------------------------------------------|
| Percent emphysema           | 0.99                                               |
| Segmental airway lumen area |                                                    |
| Right upper lobe            | 0.97                                               |
| Right middle lobe           | 0.63                                               |
| Right lower lobe            | 0.90                                               |
| Left upper lobe             | 0.92                                               |
| Left lower lobe             | 0.94                                               |

Replicate scans performed as part of the SPIROMICS Reproducibility Substudy. Ninety six participants were scanned twice with a 2 to 6 week interval. Measures were performed (VIDA Diagnostics) with full blinding of the reading center.<sup>1</sup>

**SUPPLEMENTARY INFORMATION FIGURES:**

Figure S1. Flowchart of Enrollment and Inclusion in the MESA Lung Airway Anatomy and COPD Prevalence Analyses.

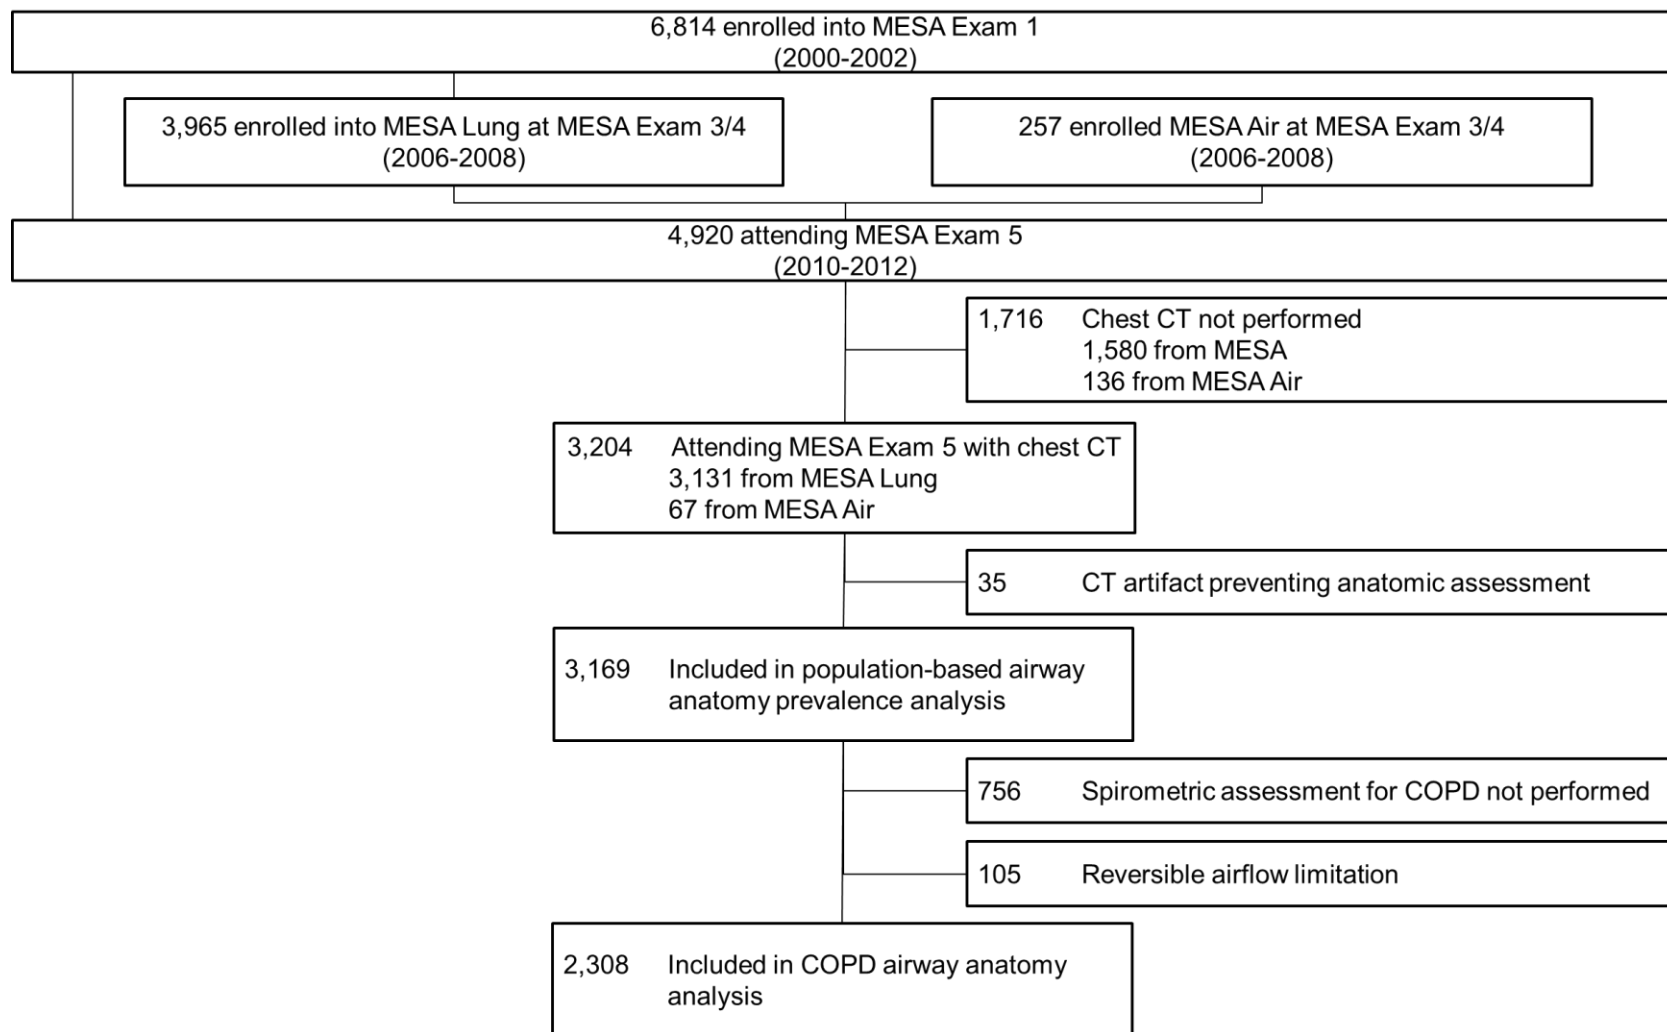

Abbreviations: MESA = Multi-Ethnic Study of Atherosclerosis; COPD = chronic obstructive pulmonary disease; CT = computed tomography.

Figure S2. Lower Lobe Segmental Airway Anatomy Assessed by CT.

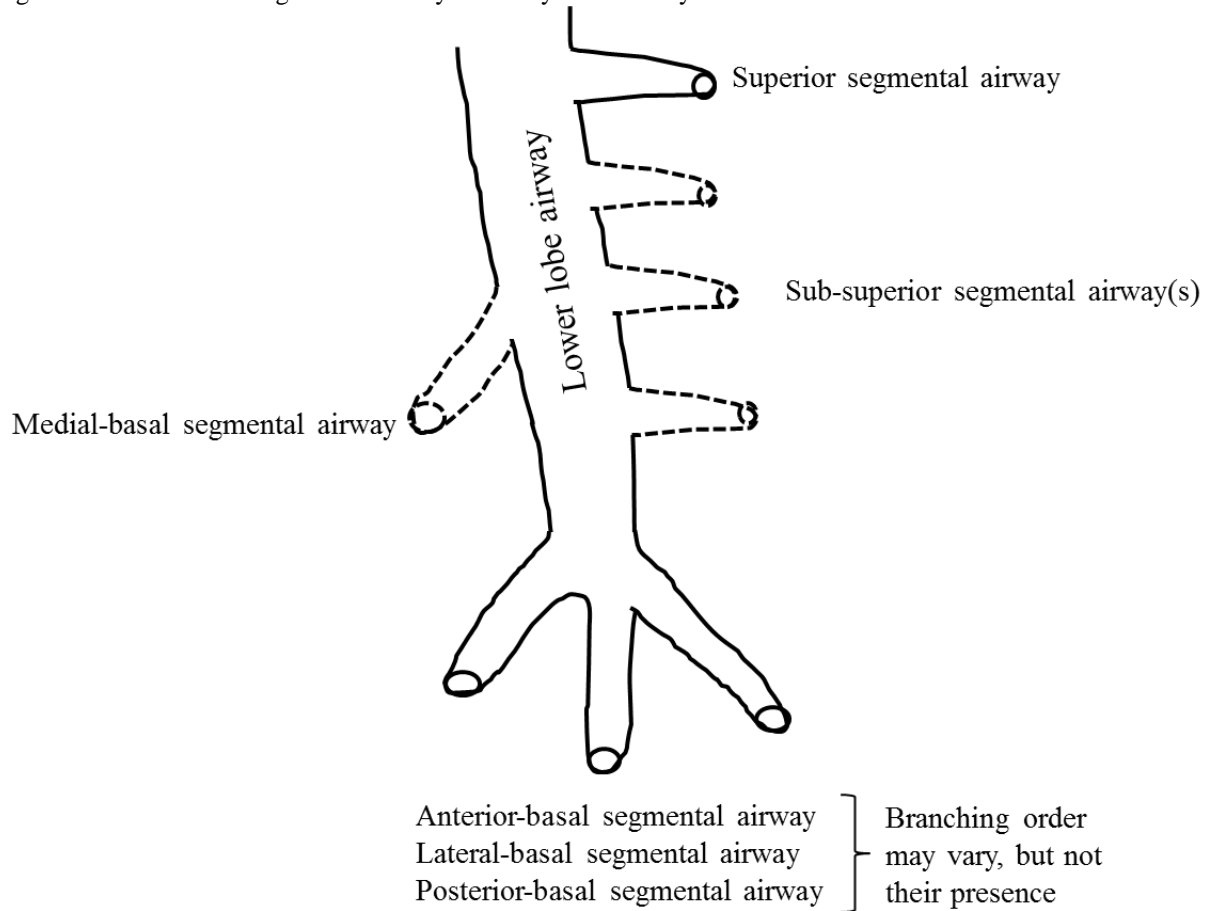

Medial perspective of right or left lower lobe segmental airways. Standard anatomy was defined as the presence of right and left superior, anterior-basal, lateral-basal, and posterior-basal segmental airways; presence of the right-medial basal segmental airway; absence of the left medial-basal segmental airway; and absence of right or left sub-superior segmental airway. Dashed lines depict common sites of segmental airway variation from the standard anatomy.

Abbreviations: CT denotes computed tomography.

Figure S3. Multi-Planar Image Assessment of Lower Lobe Segmental Airway Anatomy by Computed Tomography.

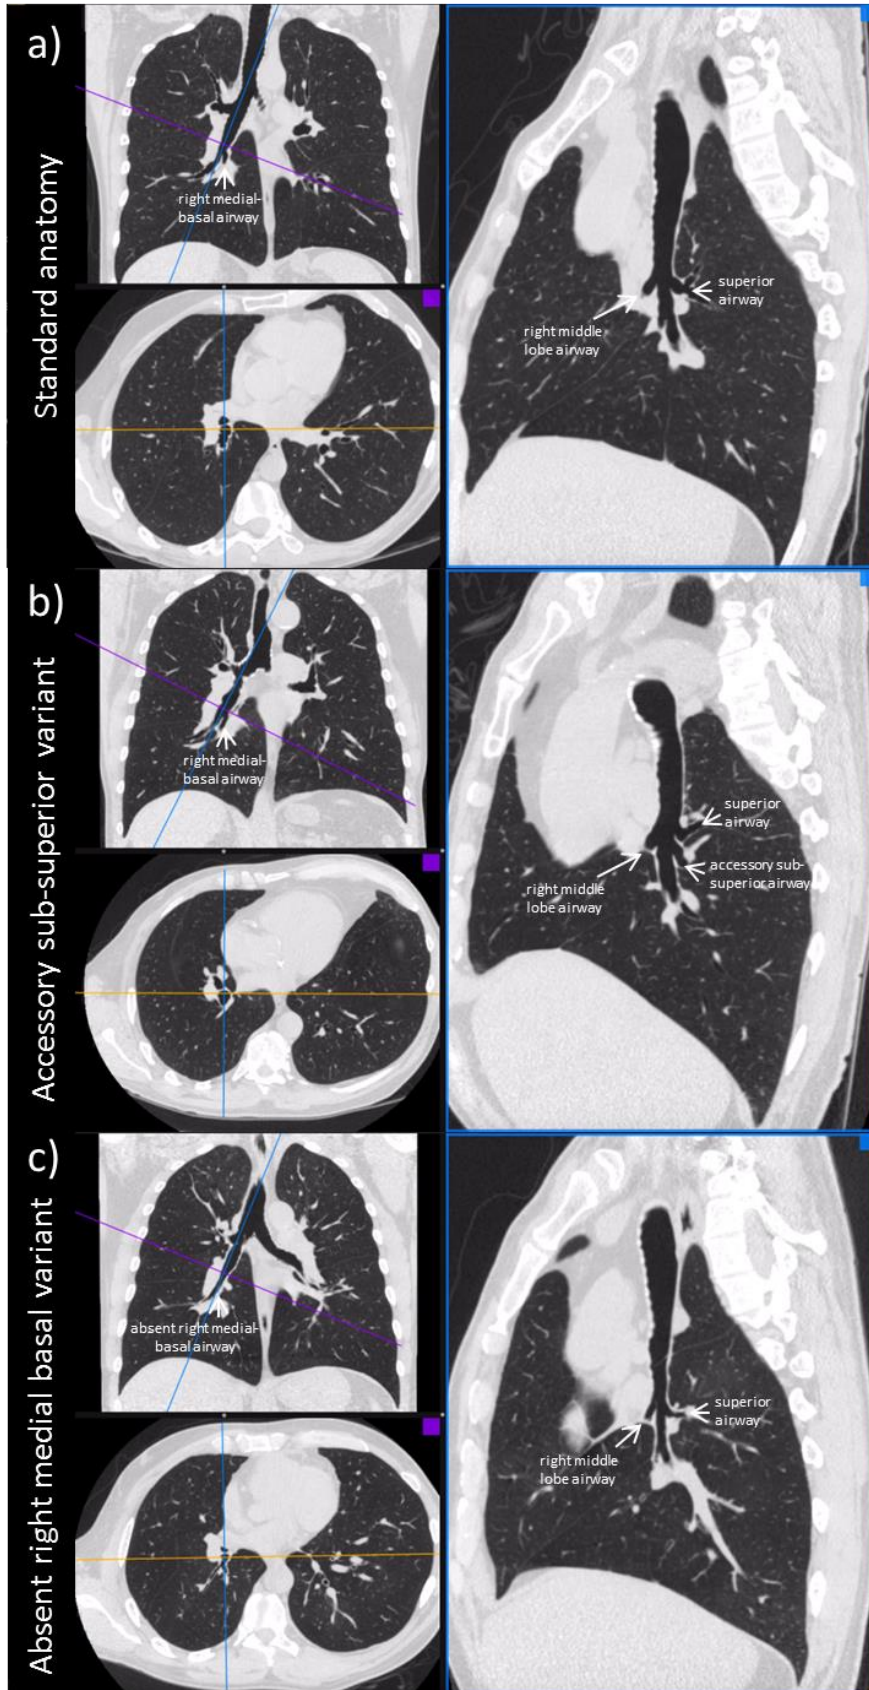



Representative multi-planar image assessment of lower segmental airway anatomy for participants with a) standard anatomy; b) an accessory sub-superior airway; and c) an absent right medial-basal airway. In each panel, the colored cross-hair is centered on the lumen of the right lower lobe airway, just inferior to the right middle lobe airway.

Figure S4. Airway Dimensions by Lobe Among Participants with Standard Anatomy and Common Airway Branch Variant Differences in the MESA Lung Study and SPIROMICS Pooled.

| Airway dimensions by lobe among participants with standard anatomy |           | Relative difference in airway dimensions by lobe among participants with common airway variants compared with standard anatomy |          |                                             |           |
|--------------------------------------------------------------------|-----------|--------------------------------------------------------------------------------------------------------------------------------|----------|---------------------------------------------|-----------|
|                                                                    |           | Accessory lower lobe sub-superior airway                                                                                       |          | Absent right lower lobe medial-basal airway |           |
| Right                                                              | Left      | Right                                                                                                                          | Left     | Right                                       | Left      |
| <b>Upper lobe</b>                                                  |           | <b>Upper lobe</b>                                                                                                              |          | <b>Upper lobe</b>                           |           |
| <b>Lumen area – mm<sup>2</sup></b>                                 |           | <b>Lumen area</b>                                                                                                              |          | <b>Lumen area</b>                           |           |
| Lobar airway                                                       | 79.0±45.2 | Lobar airway                                                                                                                   | +3.6%    | Lobar airway                                | -8.0% *   |
| Segments                                                           | 25.8±14.3 | Segments                                                                                                                       | +0.5%    | Segments                                    | -8.2% *   |
| Subsegments                                                        | 18.5±10.2 | Subsegments                                                                                                                    | +6.4%    | Subsegments                                 | -8.7% *   |
| Subsubsegments                                                     | 9.6±5.8   | Subsubsegments                                                                                                                 | +9.4%    | Subsubsegments                              | -6.4% *   |
| <b>Cumulative length – cm</b>                                      |           | <b>Cumulative length</b>                                                                                                       |          | <b>Cumulative length</b>                    |           |
|                                                                    | 4.8±0.9   |                                                                                                                                | -3.6%*   |                                             | -1.2%     |
| <b>Middle lobe</b>                                                 |           | <b>Middle lobe</b>                                                                                                             |          | <b>Middle lobe</b>                          |           |
| <b>Lumen area – mm<sup>2</sup></b>                                 |           | <b>Lumen area</b>                                                                                                              |          | <b>Lumen area</b>                           |           |
| Lobar airway                                                       | 34.8±13.7 | Lobar airway                                                                                                                   | -3.2% *  | Lobar airway                                | -1.0%     |
| Segments                                                           | 19.3±8.9  | Segments                                                                                                                       | -4.0% *  | Segments                                    | -6.3% *   |
| Subsegments                                                        | 10.0±4.7  | Subsegments                                                                                                                    | -0.5%    | Subsegments                                 | -5.5% *   |
| Subsubsegments                                                     | 6.7±3.9   | Subsubsegments                                                                                                                 | -2.1%    | Subsubsegments                              | -5.9% *   |
| <b>Cumulative length – cm</b>                                      |           | <b>Cumulative length</b>                                                                                                       |          | <b>Cumulative length</b>                    |           |
|                                                                    | 5.5±1.2   |                                                                                                                                | -1.4%*   |                                             | +0.7%     |
| <b>Lower lobe</b>                                                  |           | <b>Variant lower lobe</b>                                                                                                      |          | <b>Variant lower lobe</b>                   |           |
| <b>Airway area – mm<sup>2</sup></b>                                |           | <b>Lumen area</b>                                                                                                              |          | <b>Lumen area</b>                           |           |
| Lobar airway                                                       | 54.9±16.8 | Lobar airway                                                                                                                   | +0.1%    | Lobar airway                                | -7.6% *   |
| Segments                                                           | 22.9±25.0 | Segments                                                                                                                       | +1.8%    | Segments                                    | +4.3%     |
| Subsegments                                                        | 27.1±13.4 | Subsegments                                                                                                                    | +24.3% * | Subsegments                                 | -6.9%     |
| Subsubsegments                                                     | 22.4±11.7 | Subsubsegments                                                                                                                 | +4.4% *  | Subsubsegments                              | +113.7% * |
| <b>Cumulative length – cm</b>                                      |           | <b>Cumulative length</b>                                                                                                       |          | <b>Cumulative length</b>                    |           |
|                                                                    | 4.0±0.8   |                                                                                                                                | -7.3%*   |                                             | +29.0%*   |
|                                                                    |           |                                                                                                                                |          | <b>Lower lobe</b>                           |           |
|                                                                    |           |                                                                                                                                |          | <b>Lumen area</b>                           |           |
|                                                                    |           |                                                                                                                                |          | Lobar airway                                | -5.4% *   |
|                                                                    |           |                                                                                                                                |          | Segments                                    | -7.5% *   |
|                                                                    |           |                                                                                                                                |          | Subsegments                                 | -6.2% *   |
|                                                                    |           |                                                                                                                                |          | Subsubsegments                              | -12.8% *  |
|                                                                    |           |                                                                                                                                |          | <b>Cumulative length</b>                    |           |
|                                                                    |           |                                                                                                                                |          |                                             | +1.2%     |

\* indicates p<0.05. Mean airway dimensions (+/SD) were calculated for all airways measured from lobar to sub-sub-segmental levels within each lobe. Differences in airway dimensions by common airway branch variant status were calculated using linear regression to adjust for lobar volume, study cohort, and COPD status among SPIROMICS participants to account for the case-control design. Participants with rare airway branch variants consisting of presence of the left medial-basal airway, or combinations of the above-mentioned variants are not shown (MESA: n=103; SPIROMICS: n=137). See Methods for standard and variant airway anatomy definitions, and airway measures.

Abbreviations: MESA = Multi-Ethnic Study of Atherosclerosis; SPIROMICS = Subpopulations and Intermediate Outcome Measures in COPD Study; COPD = chronic obstructive pulmonary disease; CT = computed tomography.

Figure S5. Airway Dimensions by Lobe Among Participants with Standard Anatomy and Common Airway Branch Variant Differences in the MESA Lung

| Airway dimensions by lobe among participants with standard anatomy |                | Relative difference in airway dimensions by lobe among participants with common airway variants compared with standard anatomy |               |                                             |                |
|--------------------------------------------------------------------|----------------|--------------------------------------------------------------------------------------------------------------------------------|---------------|---------------------------------------------|----------------|
|                                                                    |                | Accessory lower lobe sub-superior airway                                                                                       |               | Absent right lower lobe medial-basal airway |                |
| Right                                                              | Left           | Right                                                                                                                          | Left          | Right                                       | Left           |
| <b>Upper lobe</b>                                                  |                | <b>Upper lobe</b>                                                                                                              |               | <b>Upper lobe</b>                           |                |
| <b>Lumen area – mm<sup>2</sup></b>                                 |                | <b>Lumen area</b>                                                                                                              |               | <b>Lumen area</b>                           |                |
| Lobar airway                                                       | 75.9±42.5      | Lobar airway                                                                                                                   | +6.2%         | Lobar airway                                | -16.9% *       |
| Segments                                                           | 24.7±14.4      | Segments                                                                                                                       | +3.9%         | Segments                                    | -11.0% *       |
| Subsegments                                                        | 18.5±10.9      | Subsegments                                                                                                                    | -0.6%         | Subsegments                                 | -9.2% *        |
| Subsubsegments                                                     | 9.3±5.7        | Subsubsegments                                                                                                                 | +18.9%        | Subsubsegments                              | -7.2% *        |
| <b>Cumulative length – cm</b>                                      | <b>4.7±0.9</b> | <b>Cumulative length</b>                                                                                                       | <b>-3.3%*</b> | <b>Cumulative length</b>                    | <b>-1.1%</b>   |
| <b>Middle lobe</b>                                                 |                | <b>Middle lobe</b>                                                                                                             |               | <b>Middle lobe</b>                          |                |
| <b>Lumen area – mm<sup>2</sup></b>                                 |                | <b>Lumen area</b>                                                                                                              |               | <b>Lumen area</b>                           |                |
| Lobar airway                                                       | 34.4±14.5      | Lobar airway                                                                                                                   | -3.5% *       | Lobar airway                                | -2.0%          |
| Segments                                                           | 18.5±8.5       | Segments                                                                                                                       | -2.8%         | Segments                                    | -7.6% *        |
| Subsegments                                                        | 9.7±4.6        | Subsegments                                                                                                                    | +4.0%         | Subsegments                                 | -6.6% *        |
| Subsubsegments                                                     | 6.6±3.3        | Subsubsegments                                                                                                                 | +1.3%         | Subsubsegments                              | -6.9% *        |
| <b>Cumulative length – cm</b>                                      | <b>5.5±1.3</b> | <b>Cumulative length</b>                                                                                                       | <b>-1.8%*</b> | <b>Cumulative length</b>                    | <b>-0.8%</b>   |
| <b>Lower lobe</b>                                                  |                | <b>Variant lower lobe</b>                                                                                                      |               | <b>Variant lower lobe</b>                   |                |
| <b>Airway area – mm<sup>2</sup></b>                                |                | <b>Lumen area</b>                                                                                                              |               | <b>Lumen area</b>                           |                |
| Lobar airway                                                       | 52.8±16.2      | Lobar airway                                                                                                                   | -0.4%         | Lobar airway                                | -0.3% *        |
| Segments                                                           | 22.2±29.4      | Segments                                                                                                                       | +2.9%         | Segments                                    | +4.4%          |
| Subsegments                                                        | 21.9±9.0       | Subsegments                                                                                                                    | +18.1% *      | Subsegments                                 | +4.9%          |
| Subsubsegments                                                     | 19.9±9.6       | Subsubsegments                                                                                                                 | -2.7%         | Subsubsegments                              | +16.7%         |
| <b>Cumulative length – cm</b>                                      | <b>4.0±0.8</b> | <b>Cumulative length</b>                                                                                                       | <b>-4.7%*</b> | <b>Cumulative length</b>                    | <b>+10.2%*</b> |
|                                                                    |                |                                                                                                                                |               | <b>Lower lobe</b>                           |                |
|                                                                    |                |                                                                                                                                |               | <b>Lumen area</b>                           |                |
|                                                                    |                |                                                                                                                                |               | Lobar airway                                | -13.7% *       |
|                                                                    |                |                                                                                                                                |               | Segments                                    | -8.4% *        |
|                                                                    |                |                                                                                                                                |               | Subsegments                                 | -8.6% *        |
|                                                                    |                |                                                                                                                                |               | Subsubsegments                              | -20.7% *       |
|                                                                    |                |                                                                                                                                |               | <b>Cumulative length</b>                    | <b>+1.4%</b>   |

Study.

\* indicates  $p < 0.05$ . Mean airway dimensions (+/SD) were calculated for all airways measured from lobar to sub-sub-segmental levels within each lobe.

Differences in airway dimensions by common airway branch variant status were calculated using linear regression to adjust for lobar volume. Participants with rare airway branch variants consisting of presence of the left medial-basal airway, or combinations of the above-mentioned variants are not shown (MESA:  $n=103$ ). See Methods for standard and variant airway anatomy definitions, and airway measures.

Abbreviations: MESA = Multi-Ethnic Study of Atherosclerosis; COPD = chronic obstructive pulmonary disease; CT = computed tomography.

Figure S6. Airway Dimensions by Lobe Among Participants with Standard Anatomy and Common Airway Branch Variant Differences in SPIROMICS.

| Airway dimensions by lobe among participants with standard anatomy |                | Relative difference in airway dimensions by lobe among participants with common airway variants compared with standard anatomy |               |                                             |                |
|--------------------------------------------------------------------|----------------|--------------------------------------------------------------------------------------------------------------------------------|---------------|---------------------------------------------|----------------|
|                                                                    |                | Accessory lower lobe sub-superior airway                                                                                       |               | Absent right lower lobe medial-basal airway |                |
| Right                                                              | Left           | Right                                                                                                                          | Left          | Right                                       | Left           |
| <b>Upper lobe</b>                                                  |                | <b>Upper lobe</b>                                                                                                              |               | <b>Upper lobe</b>                           |                |
| <b>Lumen area – mm<sup>2</sup></b>                                 |                | <b>Lumen area</b>                                                                                                              |               | <b>Lumen area</b>                           |                |
| Lobar airway                                                       | 83.0±48.2      | Lobar airway                                                                                                                   | +3.5%         | Lobar airway                                | +1.6%          |
| Segments                                                           | 27.3±14.0      | Segments                                                                                                                       | +3.9%         | Segments                                    | -9.0% *        |
| Subsegments                                                        | 18.4±8.9       | Subsegments                                                                                                                    | +13.7%        | Subsegments                                 | -7.4% *        |
| Subsubsegments                                                     | 10.1±6.0       | Subsubsegments                                                                                                                 | +4.1%         | Subsubsegments                              | -6.9% *        |
| <b>Cumulative length – cm</b>                                      | <b>4.9±0.9</b> | <b>Cumulative length</b>                                                                                                       | <b>-3.8%*</b> | <b>Cumulative length</b>                    | <b>-1.3%</b>   |
| <b>Middle lobe</b>                                                 |                | <b>Middle lobe</b>                                                                                                             |               | <b>Middle lobe</b>                          |                |
| <b>Lumen area – mm<sup>2</sup></b>                                 |                | <b>Lumen area</b>                                                                                                              |               | <b>Lumen area</b>                           |                |
| Lobar airway                                                       | 35.4±12.7      | Lobar airway                                                                                                                   | -2.6%         | Lobar airway                                | -1.0%          |
| Segments                                                           | 20.3±9.3       | Segments                                                                                                                       | -3.6% *       | Segments                                    | -7.7% *        |
| Subsegments                                                        | 10.4±4.8       | Subsegments                                                                                                                    | -1.6%         | Subsegments                                 | -6.4% *        |
| Subsubsegments                                                     | 6.9±4.6        | Subsubsegments                                                                                                                 | -2.2%         | Subsubsegments                              | -6.6% *        |
| <b>Cumulative length – cm</b>                                      | <b>5.5±1.2</b> | <b>Cumulative length</b>                                                                                                       | <b>-1.2%</b>  | <b>Cumulative length</b>                    | <b>+2.2%</b>   |
| <b>Lower lobe</b>                                                  |                | <b>Variant lower lobe</b>                                                                                                      |               | <b>Variant lower lobe</b>                   |                |
| <b>Airway area – mm<sup>2</sup></b>                                |                | <b>Lumen area</b>                                                                                                              |               | <b>Lumen area</b>                           |                |
| Lobar airway                                                       | 57.8±17.3      | Lobar airway                                                                                                                   | +2.1%         | Lobar airway                                | -7.9% *        |
| Segments                                                           | 23.9±17.5      | Segments                                                                                                                       | +1.3%         | Segments                                    | +11.7%*        |
| Subsegments                                                        | 30.6±14.7      | Subsegments                                                                                                                    | +24.2% *      | Subsegments                                 | -5.7%          |
| Subsubsegments                                                     | 25.2±13.0      | Subsubsegments                                                                                                                 | +6.9% *       | Subsubsegments                              | +124.6%*       |
| <b>Cumulative length – cm</b>                                      | <b>4.1±0.8</b> | <b>Cumulative length</b>                                                                                                       | <b>-8.2%*</b> | <b>Cumulative length</b>                    | <b>+31.2%*</b> |
|                                                                    |                | <b>Lower lobe</b>                                                                                                              |               | <b>Lower lobe</b>                           |                |
|                                                                    |                | <b>Airway area – mm<sup>2</sup></b>                                                                                            |               | <b>Lumen area</b>                           |                |
| Lobar airway                                                       | 81.4±31.6      | Lobar airway                                                                                                                   | +4.9% *       | Lobar airway                                | +2.2%          |
| Segments                                                           | 18.7±12.0      | Segments                                                                                                                       | 0.0%          | Segments                                    | -6.0% *        |
| Subsegments                                                        | 22.9±16.4      | Subsegments                                                                                                                    | -0.7%         | Subsegments                                 | -5.6%          |
| Subsubsegments                                                     | 15.2±8.1       | Subsubsegments                                                                                                                 | +1.7%         | Subsubsegments                              | -9.4% *        |
| <b>Cumulative length – cm</b>                                      | <b>4.6±0.7</b> | <b>Cumulative length</b>                                                                                                       | <b>-1.2%*</b> | <b>Cumulative length</b>                    | <b>+1.4%</b>   |

\* indicates  $p < 0.05$ . Mean airway dimensions (+/SD) were calculated for all airways measured from lobar to sub-sub-segmental levels within each lobe. Differences in airway dimensions by common airway branch variant status were calculated using linear regression to adjust for lobar volume, and COPD status to account for the case-control design of SPIROMICS. Participants with rare airway branch variants consisting of presence of the left medial-basal airway, or combinations of the above-mentioned variants are not shown (SPIROMICS: n=137). See Methods for standard and variant airway anatomy definitions, and airway measures. Abbreviations: SPIROMICS = Subpopulations and Intermediate Outcome Measures in COPD Study; COPD = chronic obstructive pulmonary disease; CT = computed tomography.

**SUPPLEMENTARY INFORMATION REFERENCES:**

1. Motahari, A., *et al.* Short term repeatability of CT-derived pulmonary airway and density measures: role of quality control measures in assuring measurement reliability in SPIROMICS. in *American Thoracic Society* A8351 (Washington, D. C., 2017).
